# Supplementary material for: Orange-red to NIR emissive carbon dots for antimicrobial, bioimaging and bacteria diagnosis
Source: Royal Society of Chemistry journal article supplement (doi:10.1039/d1tb02457d), 2022-01-01
Supplement: d1tb02457d1.pdf [file d1tb02457d1.pdf]

## Supporting Information

### Orange-red to NIR emissive carbon dots for antimicrobial, bioimaging and bacteria diagnosis

Rixiang Su,<sup>†</sup> Hongjun Yan,<sup>†</sup> Xiantao Jiang,<sup>‡</sup> Ying Zhang,<sup>†</sup> Peiyuan Li\*,<sup>†</sup> Wei Su\*,<sup>‡</sup>

<sup>‡</sup>

<sup>†</sup> College of Pharmacy, Guangxi University of Chinese Medicine, Nanning, China. E-mail: lipearpear@163.com

<sup>‡</sup> Guangxi Key Laboratory of Natural Polymer Chemistry and Physics, Nanning Normal University, Nanning 530001, P. R. China. E-mail: suwmail@163.com

**Table S1.** The elemental components of NRCQDs and Cur-NRCQDs.

| Element Contents | N(%)  | C(%)   | H(%)  | O(%)    |
|------------------|-------|--------|-------|---------|
| NRCQDs           | 0.32  | 37.395 | 4.348 | 57.041  |
| Cur-NRCQDs       | 3.305 | 60.385 | 5.821 | 29.3565 |

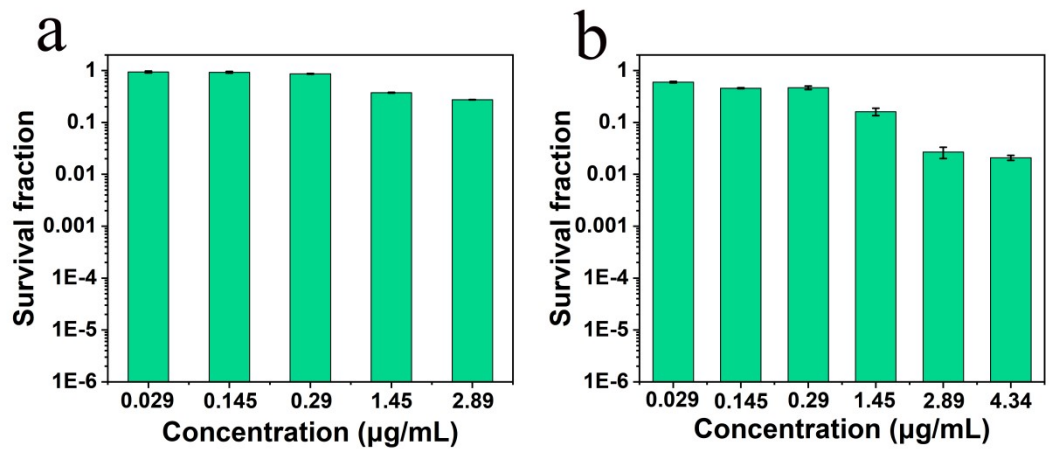

**Figure S2.** The antibacterial activities of NRCQDs were measured against (a) *S. aureus* and (b) *E. coli* under non illumination.
